# Supplementary figures and images for: RNA-seq accuracy and reproducibility for the mapping and quantification of influenza defective viral genomes
Source: PubMed Central journal article supplement — RNA. 2020 Dec;26(12):1905–18. doi: 10.1261/rna.077529.120 (PMC7668258; doi:10.1261/rna.077529.120), 2020-12

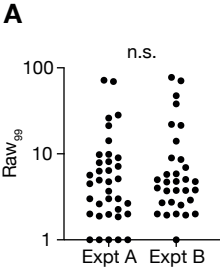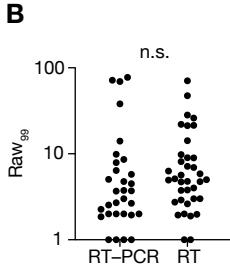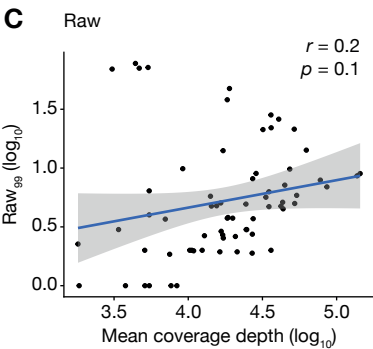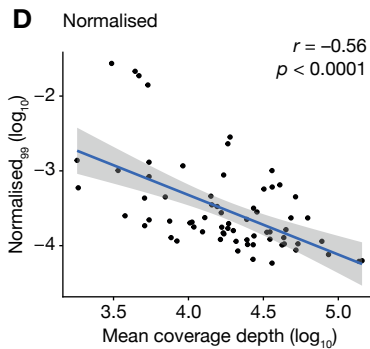

Supplement: supp_077529.120_Supplemental_Figure_1.pdf [file supp_077529.120_Supplemental_Figure_1.pdf]

**A**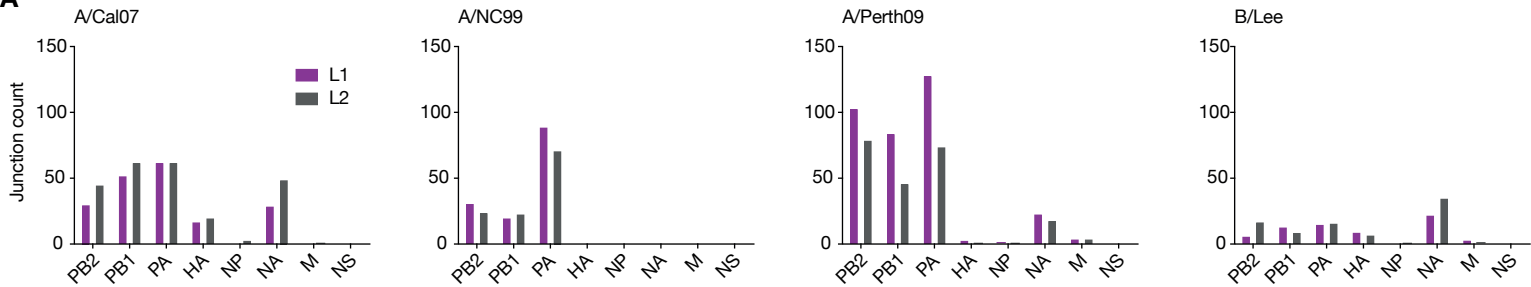**B**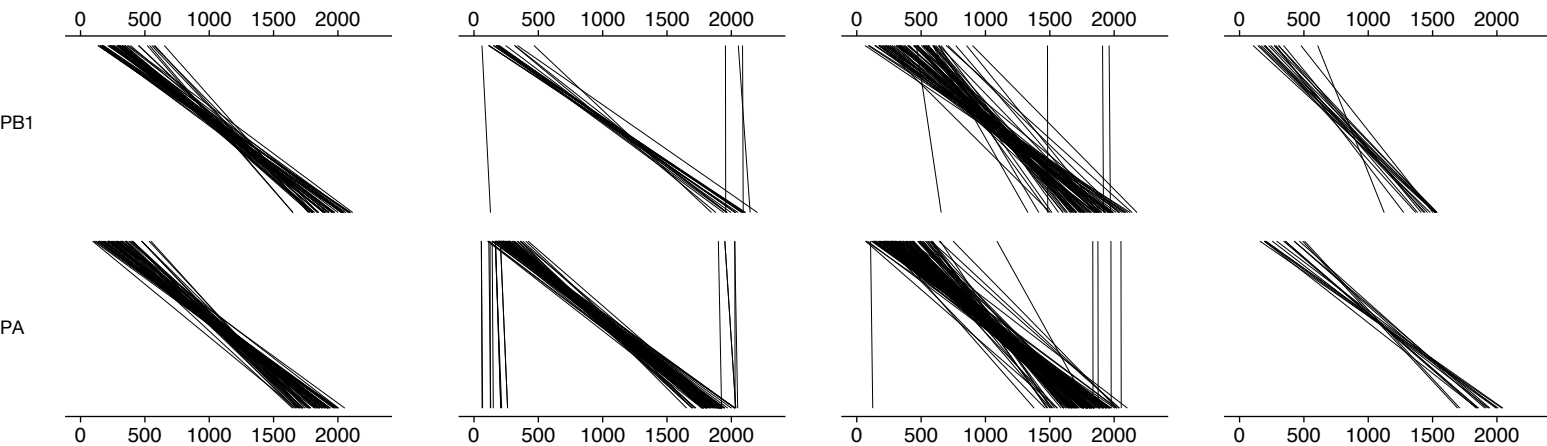

Supplement: supp_077529.120_Supplemental_Figure_2.pdf [file supp_077529.120_Supplemental_Figure_2.pdf]

**A**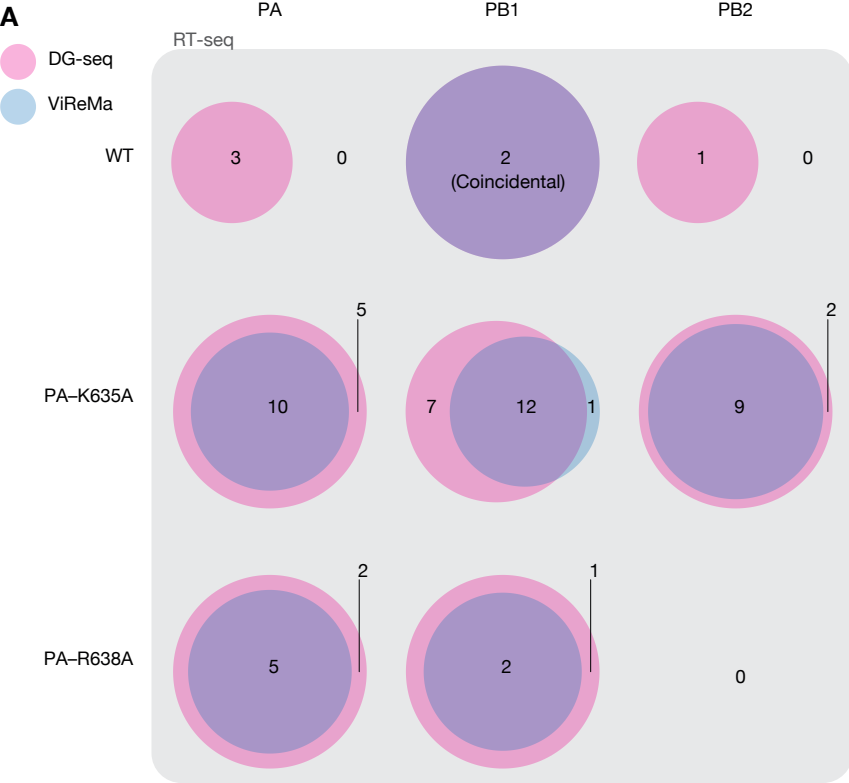**B**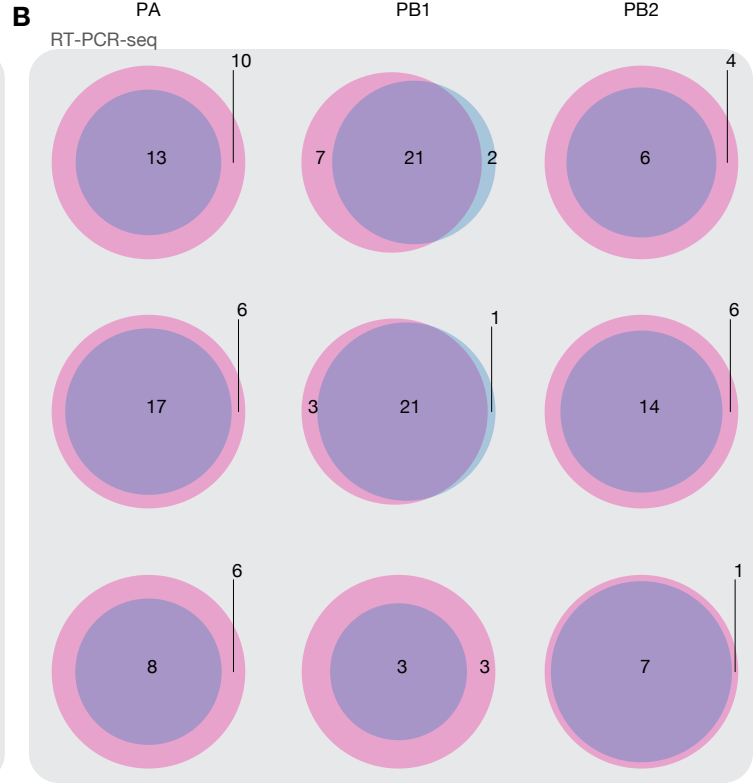

Supplement: supp_077529.120_Supplemental_Figure_3.pdf [file supp_077529.120_Supplemental_Figure_3.pdf]
